# Supplementary material for: Pharmacologic Unmasking of Epigenetically Silenced Genes in Breast Cancer
Source: Oxford University Press journal article supplement (doi:10.1158/1078-0432.ccr-08-1304), 2009-02-15
Supplement: 10780432ccr081304-sup-tab2.xls [file 10780432ccr081304-sup-tab2.xls]

## Sheet: Supplementary Table 2
Gene	Forward 5´-3´	Probe 6FAM 5´-3´TAMRA	Reverse 5´-3´	Amplicon size(Nucleotide range)	Annealing temperture
ACTB	TGG TGA TGG AGG AGG TTT AGT AAG T	ACC ACC ACC CAA CAC ACA ATA ACA AAC ACA	AAC CAA TAA AAC CTA CTC CTC CCT TAA	133 bp	60
OGDHL	TCGTTAGTATCGTGGATAGC (-119--100)	CGCCGTACCAATTACCTAAATCAC (-17-+3)	TACAAATCAAAAAACTACGCG (-22-+42)	161 bp; (-119-+42)	55
FKBP4	GTTCGTGGTGACGGTCGGTTTCGGG (-163--141)	CAAACTACGAAATAACAATAACGACGC (-134--106)	ATCCGCTACGCCTACGACG (-92--72)	91 bp; (-163--72)	58
MAL	GTTTTTAGTTTTGGACGTTCGTAG (-204--185)	AACACCGCCCTAAACCTCTTCGAAAC (-180--154)	CCAACCCCGCCCCCCGC (-117--100)	104 bp; (-204--100)	60
KIF1A	GCGCGATAAATTAGTTGGCGATT (-130--118)	CCTCCCGAAACGCTAATTAACTACGCG (-102--77)	CTCGACGACTACTCTACGCTAT (-9-+10)	140 bp; (-130-+10)	58
VGF	GGATAGCGTTCGTAGGCG (-502--483)	GCGCCCAAAAACGACGTAAACCTAAATAC (-465--447)	AAAAACCGAATTCCCCACCCCG (-430--418)	84 bp; (-502--418)	60
